# Supplementary material for: Protonation and electrochemical reduction of rhodium– and iridium–dinitrogen complexes in organic solution
Source: Royal Society of Chemistry journal article supplement (doi:10.1039/c7dt03476h), 2017-01-01
Supplement: c7dt03476h1.pdf [file c7dt03476h1.pdf]

**Electronic Supplementary Information for:**  
**Protonation and electrochemical reduction of rhodium- and iridium-dinitrogen  
complexes in organic solution**

G. P. Connor,<sup>a</sup> N. Lease,<sup>b</sup> A. Casuras,<sup>b</sup> A. S. Goldman,<sup>\*b</sup> P. L. Holland<sup>\*a</sup> and J. M. Mayer<sup>\*a</sup>

<sup>a</sup>*Department of Chemistry, Yale University, New Haven, Connecticut 06511, USA*

<sup>b</sup>*Department of Chemistry and Chemical Biology, Rutgers, The State University of New Jersey, New Brunswick, New Jersey 08903, USA*

**TABLE OF CONTENTS:**

|                                                                                                                                                                                            |           |
|--------------------------------------------------------------------------------------------------------------------------------------------------------------------------------------------|-----------|
| <b>Supplementary Data and Spectra .....</b>                                                                                                                                                | <b>2</b>  |
| <b>Fig. S1: FTIR spectrum of 1 .....</b>                                                                                                                                                   | <b>2</b>  |
| <b>Fig. S2: FTIR spectrum of 2 .....</b>                                                                                                                                                   | <b>2</b>  |
| <b>Fig. S3: <sup>1</sup>H NMR spectra showing protonation of 1 with TFA in THF-<i>d</i><sub>8</sub> .....</b>                                                                              | <b>3</b>  |
| <b>Fig. S4: <sup>31</sup>P{<sup>1</sup>H} NMR spectra showing protonation of 1 with TFA in THF-<i>d</i><sub>8</sub> .....</b>                                                              | <b>4</b>  |
| <b>Fig. S5: <sup>19</sup>F NMR spectra showing protonation of 1 with TFA in THF-<i>d</i><sub>8</sub> .....</b>                                                                             | <b>5</b>  |
| <b>Fig. S6: <sup>31</sup>P{<sup>1</sup>H} NMR spectra showing protonation of 1 with <i>p</i>CAH-BF<sub>4</sub> and deprotonation of 1b<br/>with DBU under N<sub>2</sub> .....</b>          | <b>6</b>  |
| <b>Fig. S7: <sup>31</sup>P{<sup>1</sup>H} NMR spectra showing protonation of 1 with <i>p</i>CAH-BF<sub>4</sub> and deprotonation of 1b<br/>with DBU under Ar .....</b>                     | <b>7</b>  |
| <b>Fig. S8: VT <sup>1</sup>H NMR spectra upon protonation of 2 with DMAH-BF<sub>4</sub> to form 2a .....</b>                                                                               | <b>8</b>  |
| <b>Fig. S9: VT <sup>31</sup>P{<sup>1</sup>H} NMR spectra upon protonation of 2 with DMAH-BF<sub>4</sub> to form 2a .....</b>                                                               | <b>9</b>  |
| <b>Fig. S10: <sup>31</sup>P{<sup>1</sup>H} NMR spectra showing deprotonation of 2a with DBU under N<sub>2</sub> .....</b>                                                                  | <b>10</b> |
| <b>Fig. S11: <sup>31</sup>P{<sup>1</sup>H} NMR spectra showing deprotonation of 2a with DBU under Ar .....</b>                                                                             | <b>11</b> |
| <b>Fig. S12: <sup>1</sup>H NMR spectrum showing formation of [(PCP)Ir(H)(py)<sub>x</sub>]<sup>+</sup> from reaction of 2a<br/>with pyridine-<i>d</i><sub>5</sub> .....</b>                 | <b>12</b> |
| <b>Fig. S13: <sup>31</sup>P{<sup>1</sup>H} NMR spectrum showing formation of [(PCP)Ir(H)(py)<sub>x</sub>]<sup>+</sup> from reaction of 2a<br/>with pyridine-<i>d</i><sub>5</sub> .....</b> | <b>13</b> |
| <b>Fig. S14: ATR-IR spectra of DMAH-BF<sub>4</sub>, 2, and 2a .....</b>                                                                                                                    | <b>14</b> |
| <b>Fig. S15: CV of 1 in THF with added equiv TFA .....</b>                                                                                                                                 | <b>15</b> |
| <b>Fig. S16: CV of 2 in THF with added equiv TFA .....</b>                                                                                                                                 | <b>16</b> |
| <b>Fig. S17: CV of 1 in THF with large excess of TFA .....</b>                                                                                                                             | <b>17</b> |
| <b>Fig. S18: CV of 2 in THF with large excess of TFA .....</b>                                                                                                                             | <b>18</b> |
| <b>Fig. S19: CV of 2 in THF with added DMAH-BF<sub>4</sub> .....</b>                                                                                                                       | <b>19</b> |
| <b>Fig. S20: <sup>1</sup>H NMR spectra showing reduction of 2a with CoCp<sub>2</sub><sup>*</sup> .....</b>                                                                                 | <b>20</b> |
| <b>Fig. S21: <sup>1</sup>H NMR spectrum of mixture of (PCP)IrH<sub>2</sub> and (PCP)IrH<sub>4</sub> .....</b>                                                                              | <b>21</b> |
| <b>Fig. S22: <sup>31</sup>P{<sup>1</sup>H} NMR spectrum of mixture of (PCP)IrH<sub>2</sub> and (PCP)IrH<sub>4</sub> .....</b>                                                              | <b>22</b> |
| <b>References .....</b>                                                                                                                                                                    | <b>23</b> |

**Supplementary Data and Spectra:**

**Fig. S1:** FTIR spectrum of **1**

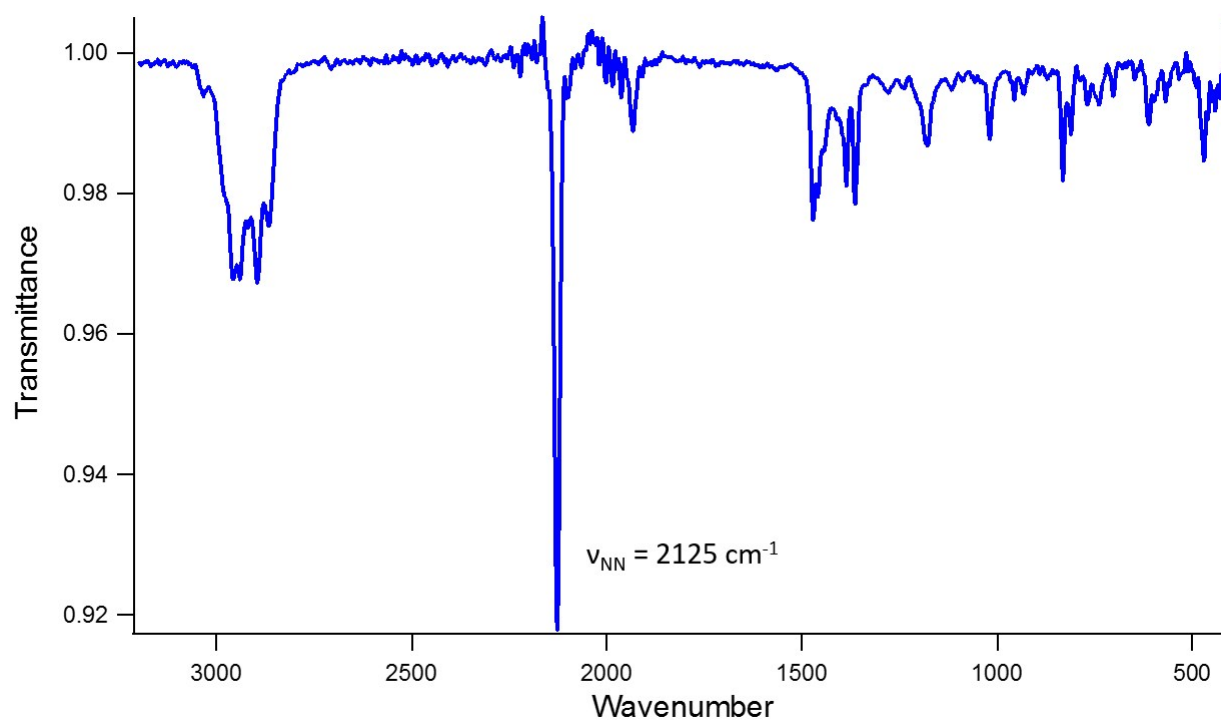

**Fig. S2:** FTIR spectrum of **2**

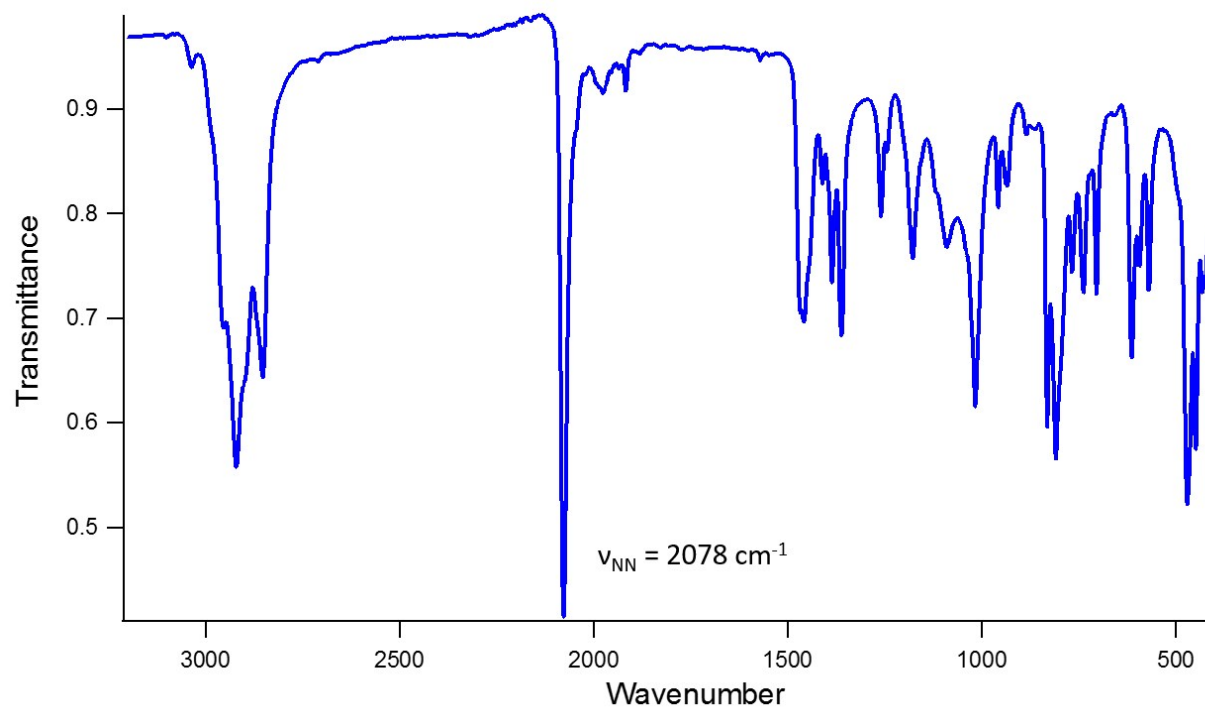

**Fig. S3:**  $^1\text{H}$  NMR spectra showing protonation of **1** with TFA in  $\text{THF-}d_8$

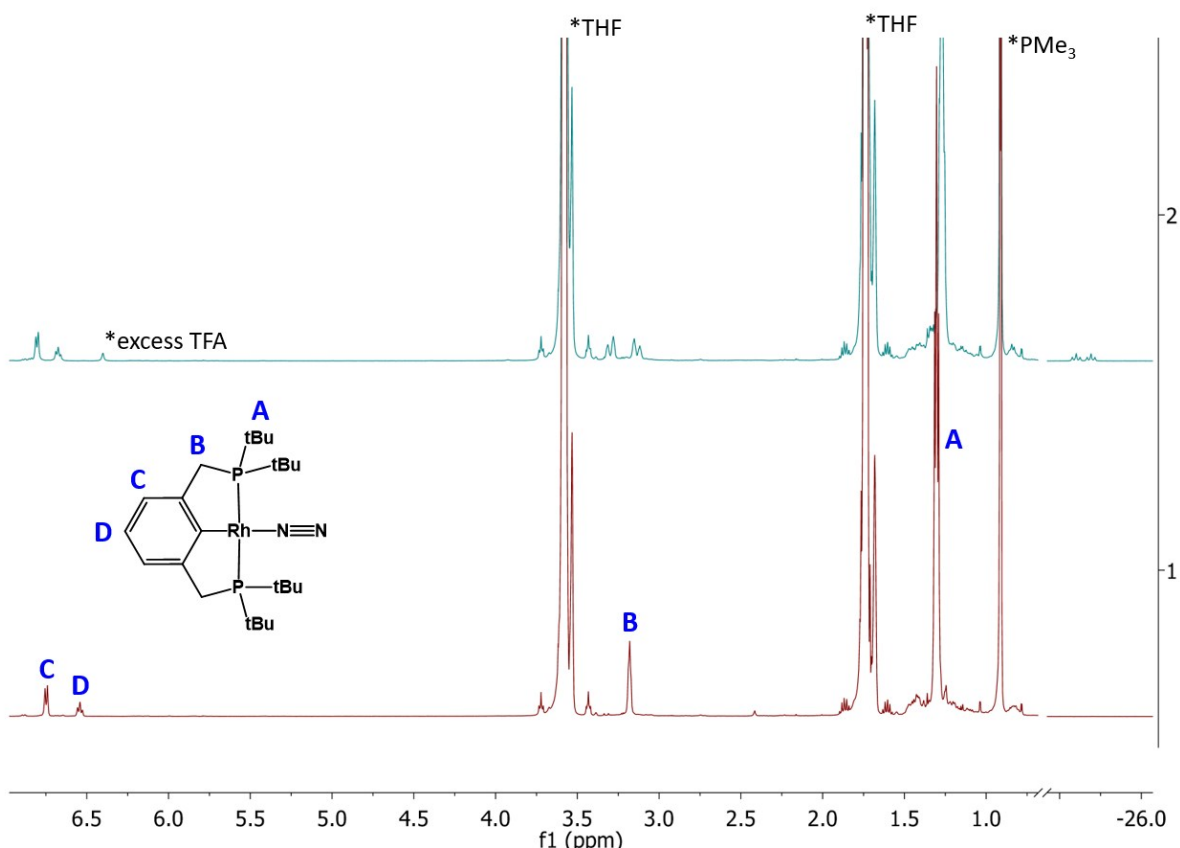

*Bottom (1, maroon):* 1.7 mg **1** (3.2  $\mu\text{mol}$ ) in  $\text{THF-}d_8$ .  $^1\text{H}$  NMR (500 MHz,  $\text{THF-}d_8$ ):  $\delta$  = 6.80 (d,  $^3J_{\text{H,H}}$  = 7.3 Hz, 2H, *m*-Ph), 6.59 (t,  $^3J_{\text{H,H}}$  = 7.3 Hz, 1H, *p*-Ph), 3.23 (m, 4H,  $\text{CH}_2$ ), 1.35 (m,  $^2J_{\text{P,H}}$  = 6.2 Hz, 36H,  $\text{C}(\text{CH}_3)_3$ ). *Top (2, teal):* 1.7 mg **1** in  $\text{THF-}d_8$  with 1.1 eq. TFA added.  $^1\text{H}$  NMR (500 MHz,  $\text{THF-}d_8$ , **1a**):  $\delta$  = 6.85 (d,  $^3J_{\text{H,H}}$  = 7.3 Hz, 2H, *m*-Ph), 6.72 (t,  $^3J_{\text{H,H}}$  = 7.3 Hz, 1H, *p*-Ph), 3.38 – 3.13 (m, 4H,  $\text{CH}_2$ ), 1.32 (m,  $^2J_{\text{P,H}}$  = 6.4 Hz, 36H,  $\text{C}(\text{CH}_3)_3$ ), -25.60 (dt,  $^1J_{\text{Rh,H}}$  = 45.4,  $^2J_{\text{P,H}}$  = 11.8 Hz, 1H, Rh-H). The spectrum describes a diamagnetic complex, and the loss of  $\text{C}_{2v}$  symmetry is evident from splitting of methylene and <sup>t</sup>Bu resonances. A hydride peak is visible at -25.60 ppm. The  $\text{PMe}_3$  peak is from the internal standard in a capillary tube.

**Fig. S4:**  $^{31}\text{P}\{^1\text{H}\}$  NMR spectra showing protonation of **1** with TFA in  $\text{THF-}d_8$

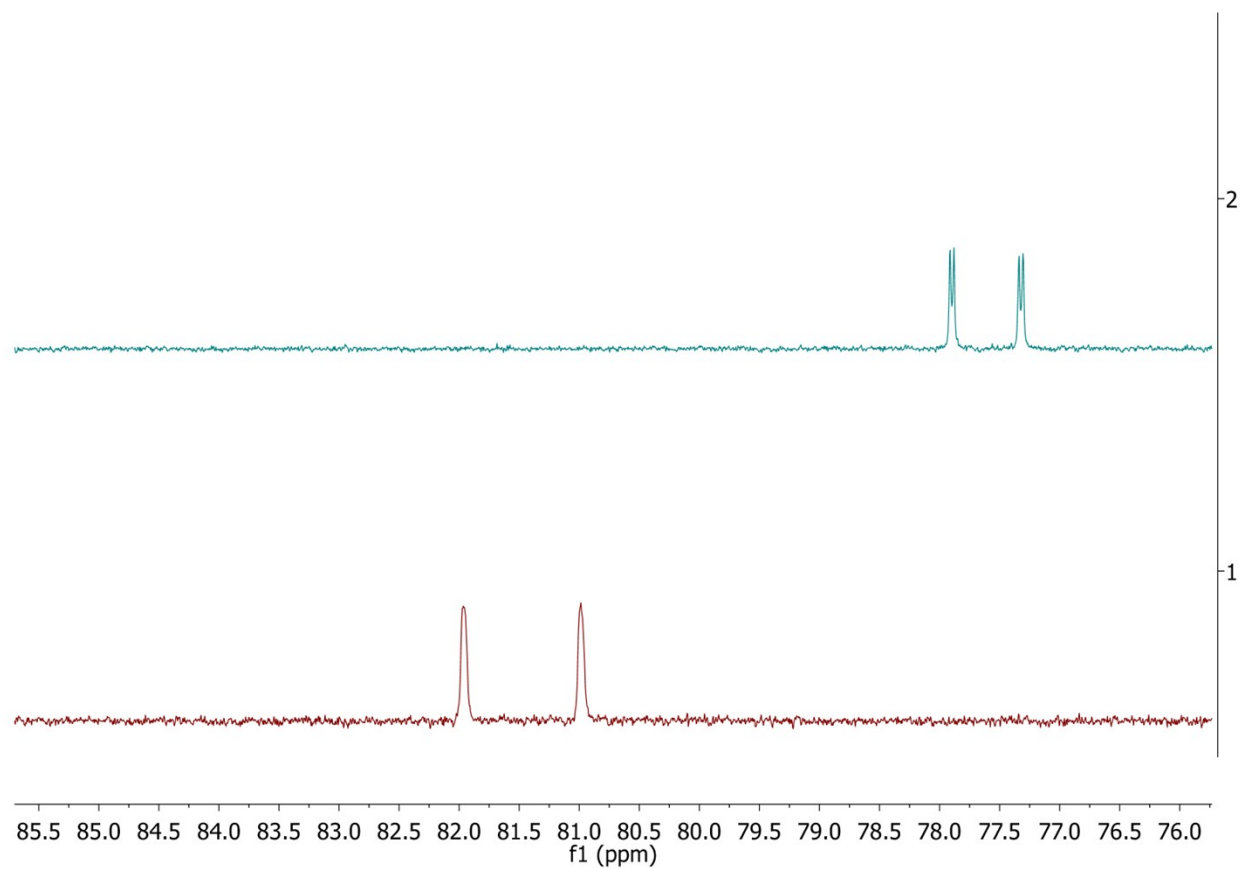

*Bottom (1, maroon):* 1.7 mg **1** (3.2  $\mu\text{mol}$ ) in  $\text{THF-}d_8$ .  $^{31}\text{P}\{^1\text{H}\}$  NMR (162 MHz,  $\text{THF-}d_8$ ):  $\delta = 81.48$  (d,  $^1J_{\text{P,Rh}} = 158.2$  Hz). *Top (2, teal):* 1.7 mg **1** in  $\text{THF-}d_8$  with 1.1 eq. TFA added.  $^{31}\text{P}\{^1\text{H}\}$  NMR (202 MHz,  $\text{THF-}d_8$ ):  $\delta = 77.61$  (dd,  $^1J_{\text{P,Rh}} = 116.4$  Hz,  $^2J_{\text{P,H}} = 6.8$  Hz, **1a**). Referenced to  $\text{PMe}_3$  in a capillary tube.

**Fig. S5:**  $^{19}\text{F}$  NMR spectra showing protonation of **1** with TFA in  $\text{THF-}d_8$

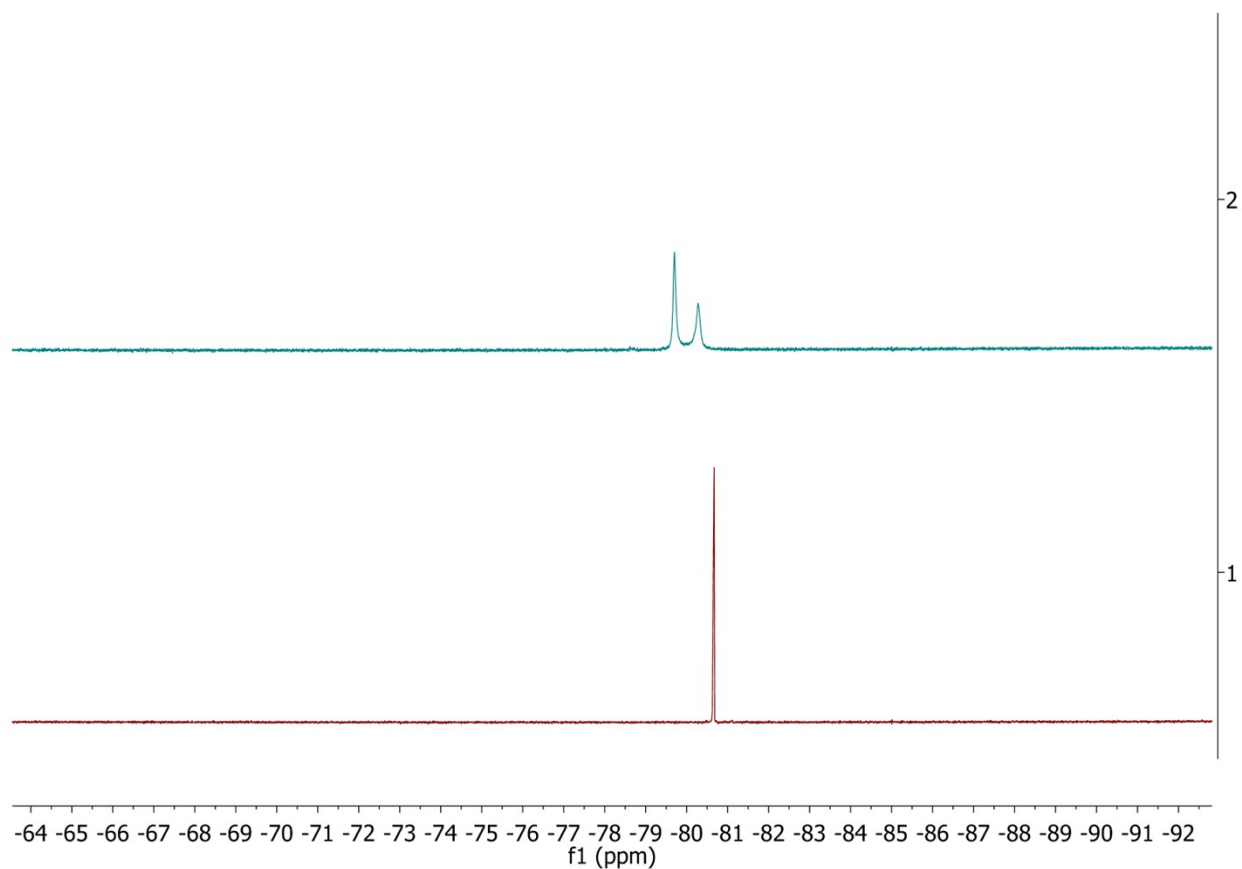

*Bottom (1, maroon):* 3.0  $\mu\text{mol}$  TFA in  $\text{THF-}d_8$ .  $^{19}\text{F}$  NMR (470 MHz,  $\text{THF-}d_8$ ):  $\delta = -80.67$  (s). *Top (2, teal):* 3.0  $\mu\text{mol}$  TFA with 1.4 mg **1** (2.7  $\mu\text{mol}$ , 0.9 eq.) added in  $\text{THF-}d_8$ .  $^{19}\text{F}$  NMR (470 MHz,  $\text{THF-}d_8$ ):  $\delta = -79.70$  (s), -80.28 (br. s).

**Fig. S6:**  $^{31}\text{P}\{^1\text{H}\}$  NMR spectra showing protonation of **1** with  $p\text{CAH-BF}_4$  and deprotonation of **1b** with DBU under  $\text{N}_2$

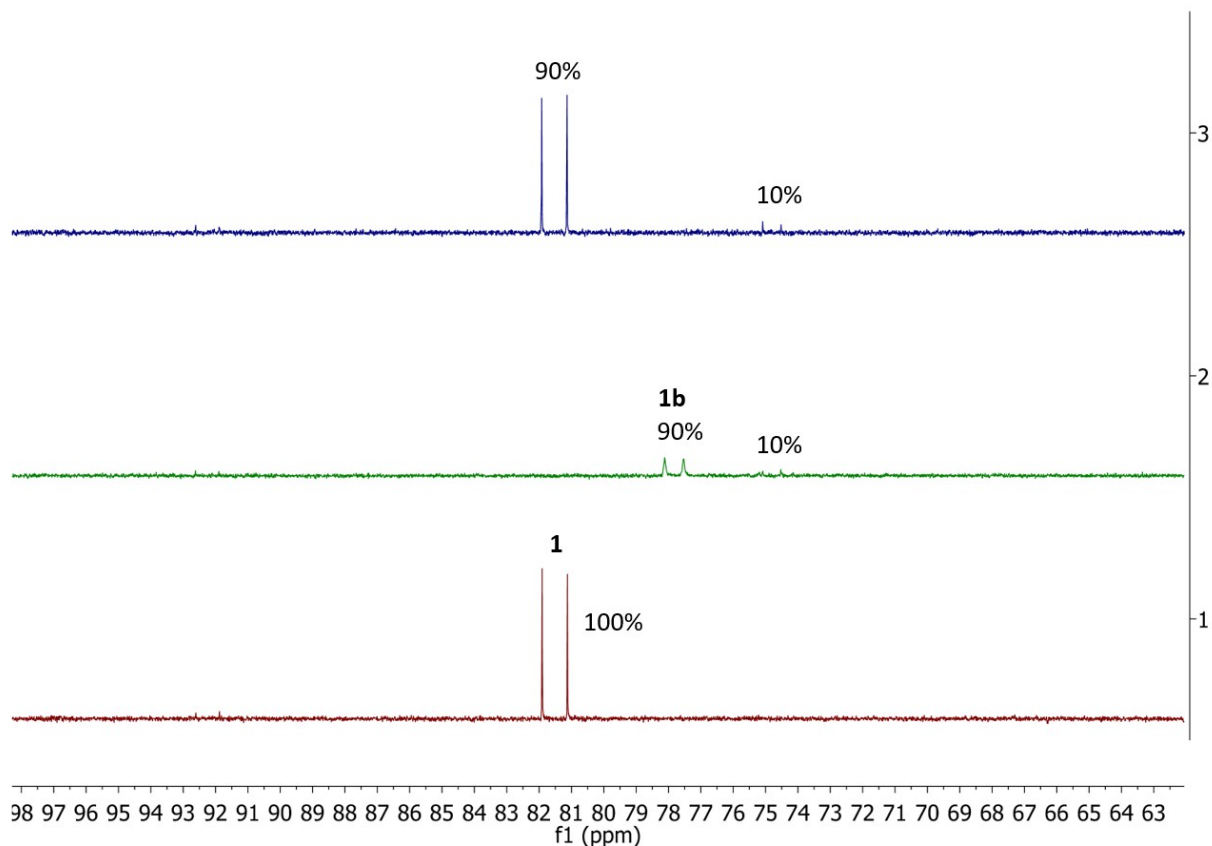

*Bottom (1, maroon):* 1.2 mg **1** (2.3  $\mu\text{mol}$ ) in  $\text{THF-}d_8$  under  $\text{N}_2$ .  $^{31}\text{P}\{^1\text{H}\}$  NMR (202 MHz,  $\text{THF-}d_8$ ):  $\delta = 81.52$  (d,  $^1J_{\text{P,Rh}} = 157.9$  Hz, 100%). *Middle (2, green):* 1.2 mg **1** with 1 eq.  $p\text{CAH-BF}_4$  in  $\text{THF-}d_8$  under  $\text{N}_2$ .  $^{31}\text{P}\{^1\text{H}\}$  NMR (202 MHz,  $\text{THF-}d_8$ ):  $\delta = 77.83$  (d,  $^1J_{\text{P,Rh}} = 117.4$  Hz, 90%, **1b**),  $74.81$  (d,  $^1J_{\text{P,Rh}} = 112.7$  Hz, 10%). *Top (3, blue):* 1.2 mg **1** with 1 eq.  $p\text{CAH-BF}_4$  and 1.1 eq. DBU in  $\text{THF-}d_8$  under  $\text{N}_2$ .  $^{31}\text{P}\{^1\text{H}\}$  NMR (202 MHz,  $\text{THF-}d_8$ ):  $\delta = 81.53$  (d,  $^1J_{\text{P,Rh}} = 157.9$  Hz, 90%),  $74.80$  (d,  $^1J_{\text{P,Rh}} = 115.2$  Hz, 10%). Protonation of **1** with  $p\text{CAH-BF}_4$  under  $\text{N}_2$  gives **1b**, and subsequent addition of DBU reforms complex **1** in 90% yield. Integrations are referenced to an internal standard of  $\text{PMe}_3$  in a capillary tube, and yields are rounded to one significant figure.

**Fig. S7:**  $^{31}\text{P}\{^1\text{H}\}$  NMR spectra showing protonation of **1** with  $p\text{CAH-BF}_4$  and deprotonation of **1b** with DBU under Ar

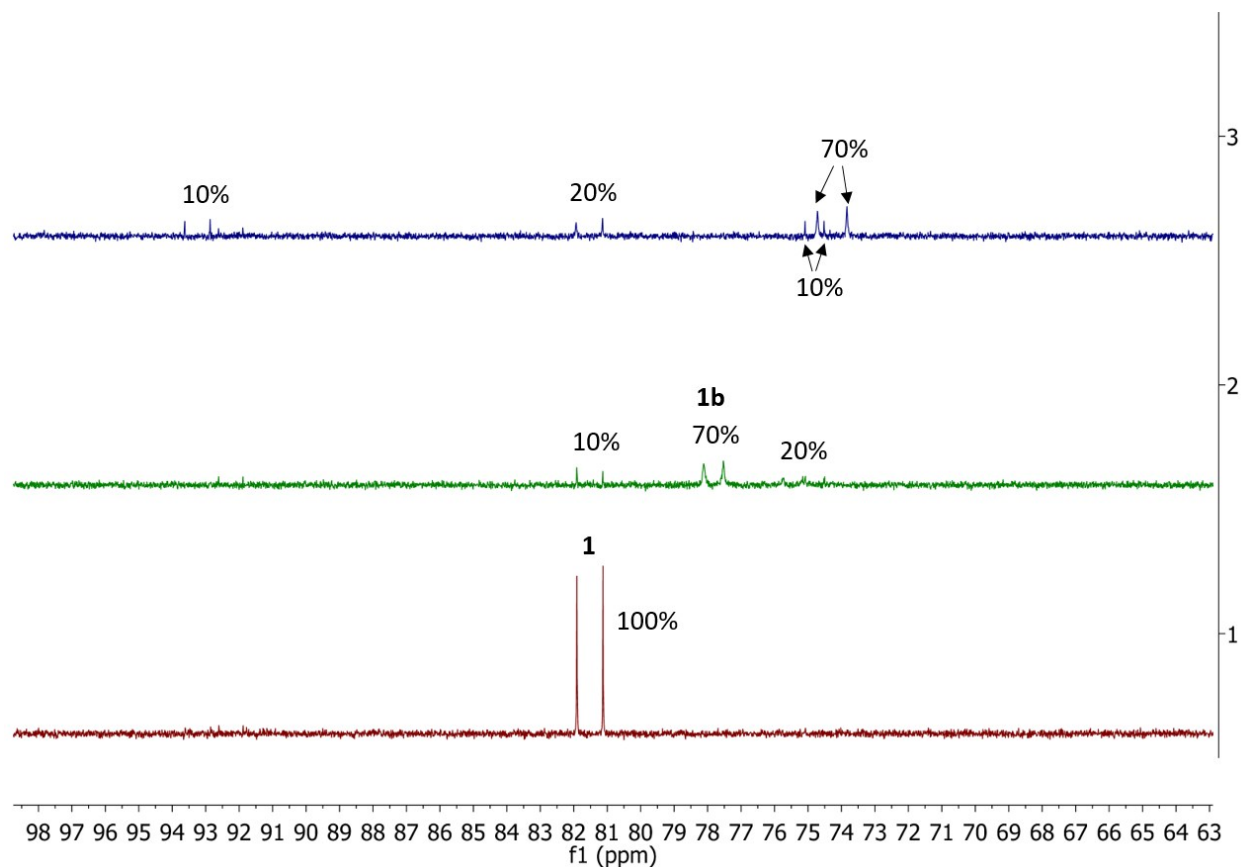

*Bottom (1, maroon):* 1.3 mg **1** (2.5  $\mu\text{mol}$ ) in  $\text{THF-}d_8$  under Ar.  $^{31}\text{P}\{^1\text{H}\}$  NMR (202 MHz,  $\text{THF-}d_8$ ):  $\delta = 81.52$  (d,  $^1J_{\text{P,Rh}} = 158.0$  Hz, 100%). *Middle (2, green):* 1.3 mg **1** with 1 eq.  $p\text{CAH-BF}_4$  in  $\text{THF-}d_8$  under Ar.  $^{31}\text{P}\{^1\text{H}\}$  NMR (202 MHz,  $\text{THF-}d_8$ ):  $\delta = 81.52$  (d,  $^1J_{\text{P,Rh}} = 157.7$  Hz, 10%), 77.82 (br. d,  $^1J_{\text{P,Rh}} = 121.2$  Hz, 70%, **1b**), 75.45 (d,  $^1J_{\text{P,Rh}} = 120.6$  Hz, 20%). *Top (3, blue):* 1.3 mg **1** with 1 eq.  $p\text{CAH-BF}_4$  and 1.1 eq. DBU in  $\text{THF-}d_8$  under Ar.  $^{31}\text{P}\{^1\text{H}\}$  NMR (202 MHz,  $\text{THF-}d_8$ ):  $\delta = 93.25$  (d,  $^1J_{\text{P,Rh}} = 154.0$  Hz, 10%), 81.54 (d,  $^1J_{\text{P,Rh}} = 159.7$  Hz, 20%), 74.80 (d,  $^1J_{\text{P,Rh}} = 115.0$  Hz, 10%), 74.28 (d,  $^1J_{\text{P,Rh}} = 178.3$  Hz, 70%). Integrations are referenced to an internal standard of  $\text{PMe}_3$  in a capillary tube, and yields are rounded to one significant figure.

**Fig. S8:** VT  $^1\text{H}$  NMR spectra upon protonation of **2** with DMAH-BF<sub>4</sub> to form **2a**

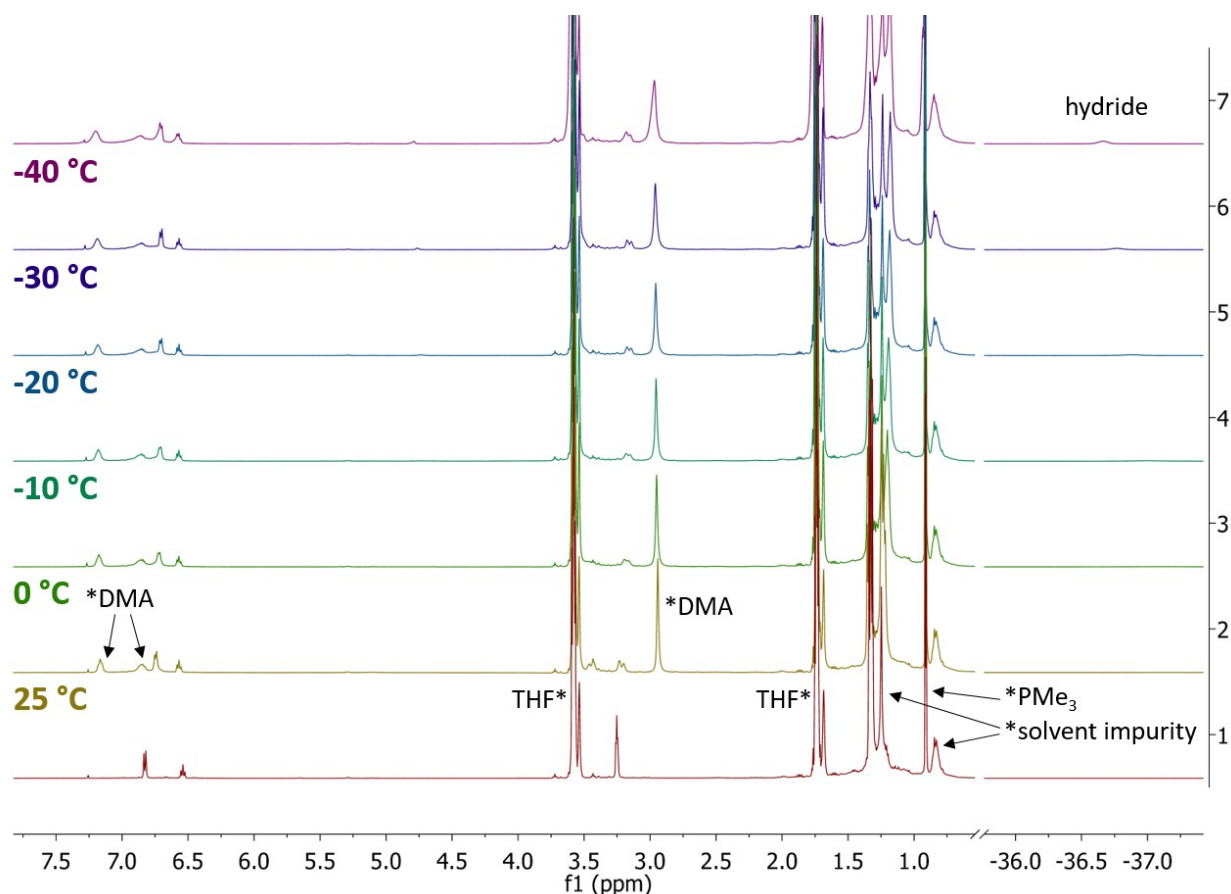

*Bottom (1, maroon):* 3.4 mg **2** (5.5  $\mu\text{mol}$ ) in THF- $d_8$ .  $^1\text{H}$  NMR (500 MHz, THF- $d_8$ , **2**):  $\delta$  = 6.83 (d,  $^3J_{\text{H,H}}$  = 7.4 Hz, 2H, *m*-Ph), 6.54 (t,  $^3J_{\text{H,H}}$  = 7.4 Hz, 1H, *p*-Ph), 3.25 (m, 4H,  $\text{CH}_2$ ), 1.33 (m,  $^2J_{\text{P,H}}$  = 6.4 Hz, 36H,  $\text{C}(\text{CH}_3)_3$ ).

*Second to bottom (2, gold):* 3.4 mg **2** (5.5  $\mu\text{mol}$ ) with 1 eq. DMAH-BF<sub>4</sub> in THF- $d_8$  at 25 °C.  $^1\text{H}$  NMR (500 MHz, THF- $d_8$ , **2a**)  $\delta$  = 6.75 (d,  $^3J_{\text{H,H}}$  = 7.5 Hz, 2H, *m*-Ph), 6.57 (t,  $^3J_{\text{H,H}}$  = 7.5 Hz, 1H, *p*-Ph), 3.50 – 3.15 (m, 4H,  $\text{CH}_2$ ), 1.34 (m,  $^2J_{\text{P,H}}$  = 6.7 Hz, 18H,  $\text{C}(\text{CH}_3)_3$ ), 1.27 – 1.15 (m, 18H,  $\text{C}(\text{CH}_3)_3$ ). The spectrum describes a diamagnetic complex, and the loss of  $C_{2v}$  symmetry is evident from splitting of methylene and  $^t\text{Bu}$  resonances; however, no hydride resonance is resolved at ambient temperature.

*Third from bottom and upwards (3-7, green through plum):* 3.4 mg **2** (5.5  $\mu\text{mol}$ ) with 1 eq. DMAH-BF<sub>4</sub> in THF- $d_8$  at various temperatures. A hydride resonance resolves at low temperatures and is visible at -40 °C at  $\delta$  = -36.7 (br. s, 1H, Ir-H).

**Fig. S9:** VT  $^{31}\text{P}\{^1\text{H}\}$  NMR spectra upon protonation of **2** with DMAH-BF<sub>4</sub> to form **2a**

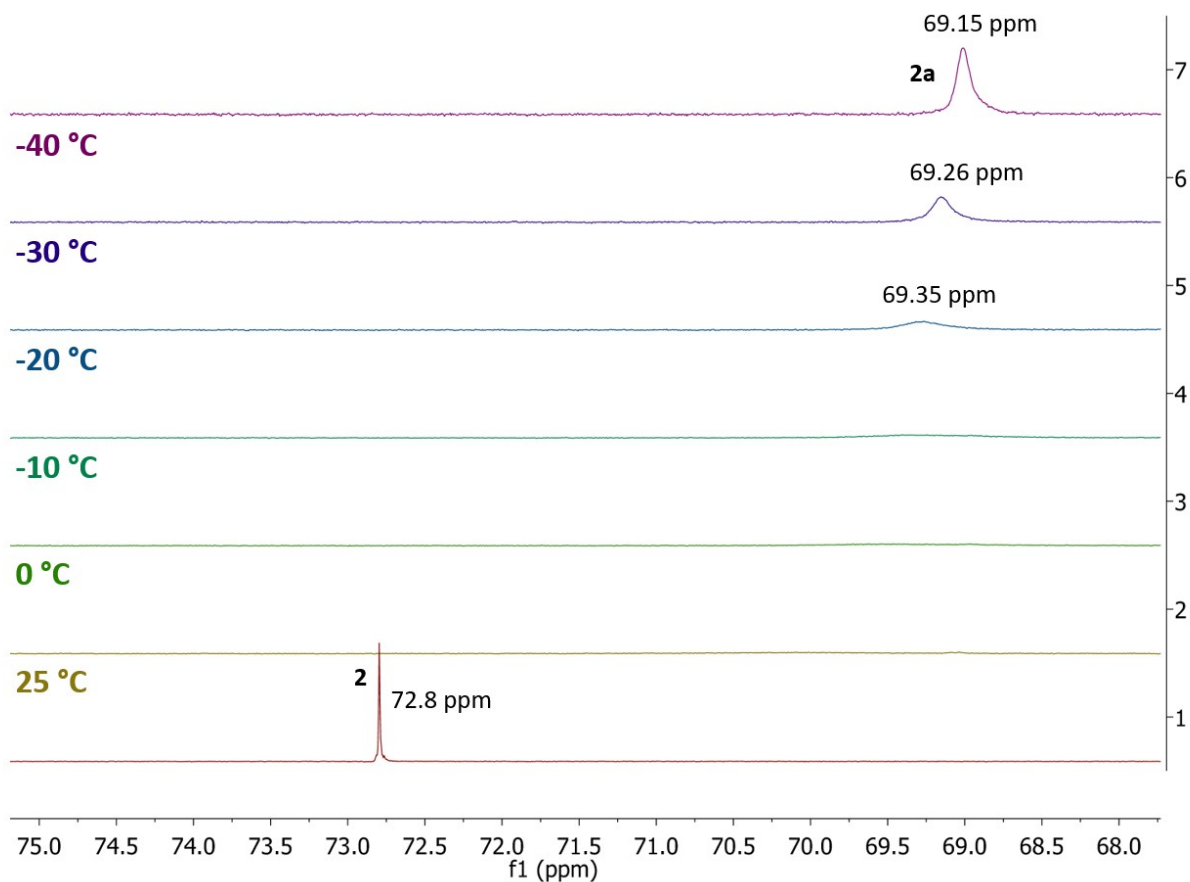

*Bottom (1, maroon):* 3.4 mg **2** (5.5  $\mu\text{mol}$ ) in THF- $d_8$ .  $^{31}\text{P}\{^1\text{H}\}$  NMR (202 MHz, THF- $d_8$ , **2**):  $\delta$  = 72.80 (s).  
*Second to bottom (2, gold):* 3.4 mg **2** (5.5  $\mu\text{mol}$ ) with 1 eq. DMAH-BF<sub>4</sub> in THF- $d_8$  at 25 °C. No phosphorus resonance is visible for the diamagnetic complex described in the corresponding  $^1\text{H}$  NMR spectrum (see Fig. S8).  
*Third from bottom and upwards (3-7, green through plum):* 3.4 mg **2** (5.5  $\mu\text{mol}$ ) with 1 eq. DMAH-BF<sub>4</sub> in THF- $d_8$  at various temperatures. A phosphorus resonance resolves at low temperatures and is visible at -40 °C at  $\delta$  = 69.15 (br. s).

**Fig. S10:**  $^{31}\text{P}\{^1\text{H}\}$  NMR spectra showing deprotonation of **2a** with DBU under  $\text{N}_2$

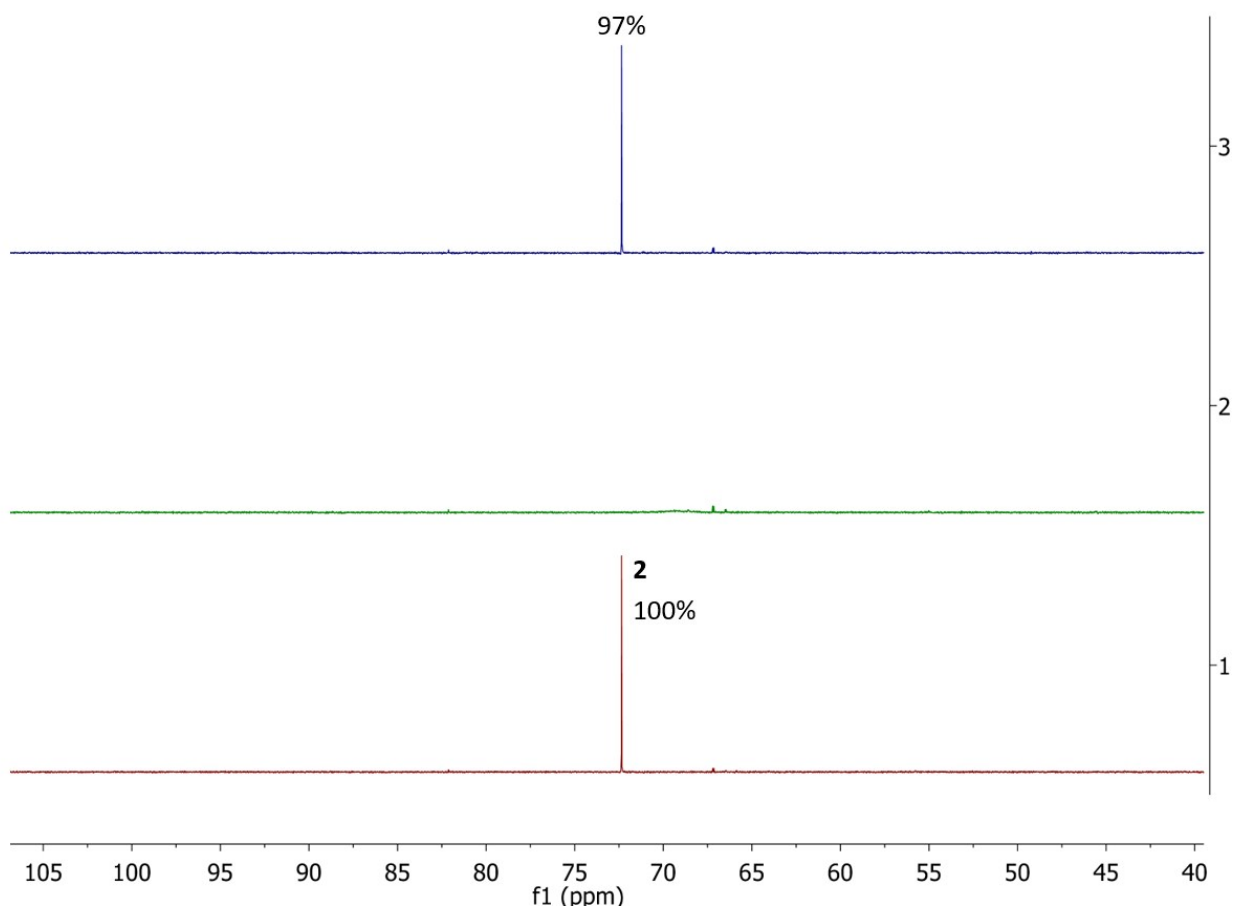

*Bottom (1, maroon):* 2.8 mg **2** (4.6  $\mu\text{mol}$ ) in  $\text{THF-}d_8$ .  $^{31}\text{P}\{^1\text{H}\}$  NMR (202 MHz,  $\text{THF-}d_8$ , **2**):  $\delta = 72.80$  (s).  
*Middle (2, green):* 2.8 mg **2** (4.6  $\mu\text{mol}$ ) with 1 eq. DMAH- $\text{BF}_4$  in  $\text{THF-}d_8$ . No phosphorus resonance is visible for the diamagnetic complex **2a** at 25  $^\circ\text{C}$  (see Fig. S9).  
*Top (3, blue):* 2.8 mg **2** (4.6  $\mu\text{mol}$ ) with 1 eq. DMAH- $\text{BF}_4$  and 1.1 eq. DBU in  $\text{THF-}d_8$ .  $^{31}\text{P}\{^1\text{H}\}$  NMR (202 MHz,  $\text{THF-}d_8$ ):  $\delta = 72.80$  (s). **2** is reformed in 97% yield upon deprotonation of **2a** with DBU under  $\text{N}_2$ . Integrations are referenced to an internal standard of  $\text{PMe}_3$  in a capillary tube.

**Fig. S11:**  $^{31}\text{P}\{^1\text{H}\}$  NMR spectra showing deprotonation of **2a** with DBU under Ar

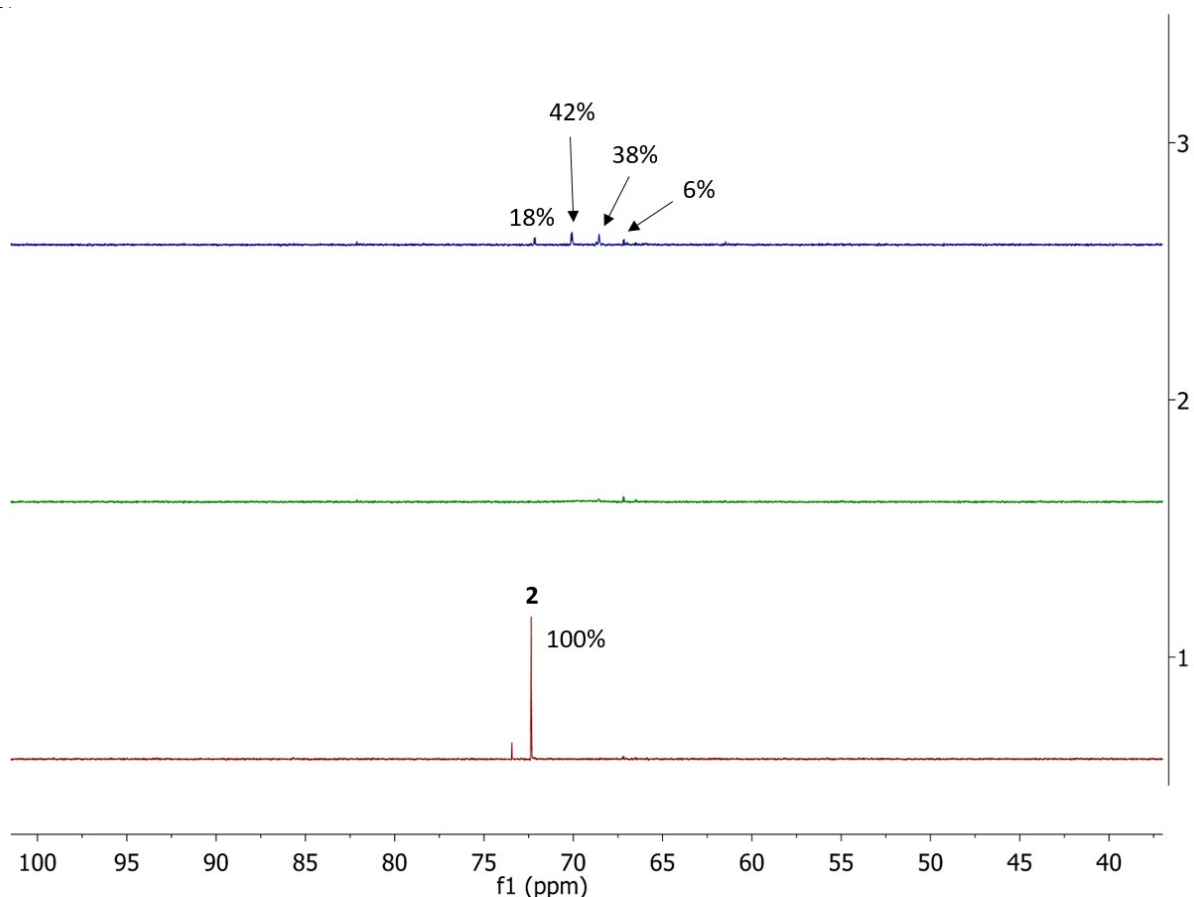

*Bottom (1, maroon):* 1.3 mg **2** (2.1  $\mu\text{mol}$ ) in  $\text{THF-}d_8$ .  $^{31}\text{P}\{^1\text{H}\}$  NMR (202 MHz,  $\text{THF-}d_8$ , **2**):  $\delta = 72.80$  (s).  
*Middle (2, green):* 1.3 mg **2** (2.1  $\mu\text{mol}$ ) with 1 eq. DMAH-BF<sub>4</sub> in  $\text{THF-}d_8$ . No phosphorus resonance is visible for the diamagnetic complex **2a** at 25 °C (see Fig. S9).  
*Top (3, blue):* 1.3 mg **2** (2.1  $\mu\text{mol}$ ) with 1 eq. DMAH-BF<sub>4</sub> and 1.1 eq. DBU in  $\text{THF-}d_8$ .  $^{31}\text{P}\{^1\text{H}\}$  NMR (202 MHz,  $\text{THF-}d_8$ ):  $\delta = 72.60$  (d,  $J = 11.5$  Hz, 18%), 70.53 (d,  $J = 11.1$  Hz, 42%), 69.00 (br. s, 38%), 67.62 (d,  $J = 12.1$  Hz, 6%). Upon deprotonation under Ar, a number of unidentified products are formed. In contrast to deprotonation under N<sub>2</sub> (Figure S10), no **2** is reformed, indicating that N<sub>2</sub> is lost upon protonation with DMAH-BF<sub>4</sub>. Integrations are referenced to an internal standard of PMe<sub>3</sub> in a capillary tube.

**Fig. S12:**  $^1\text{H}$  NMR spectrum showing formation of  $[(\text{PCP})\text{Ir}(\text{H})(\text{py})_x]^+$  from reaction of **2a** with pyridine- $d_5$

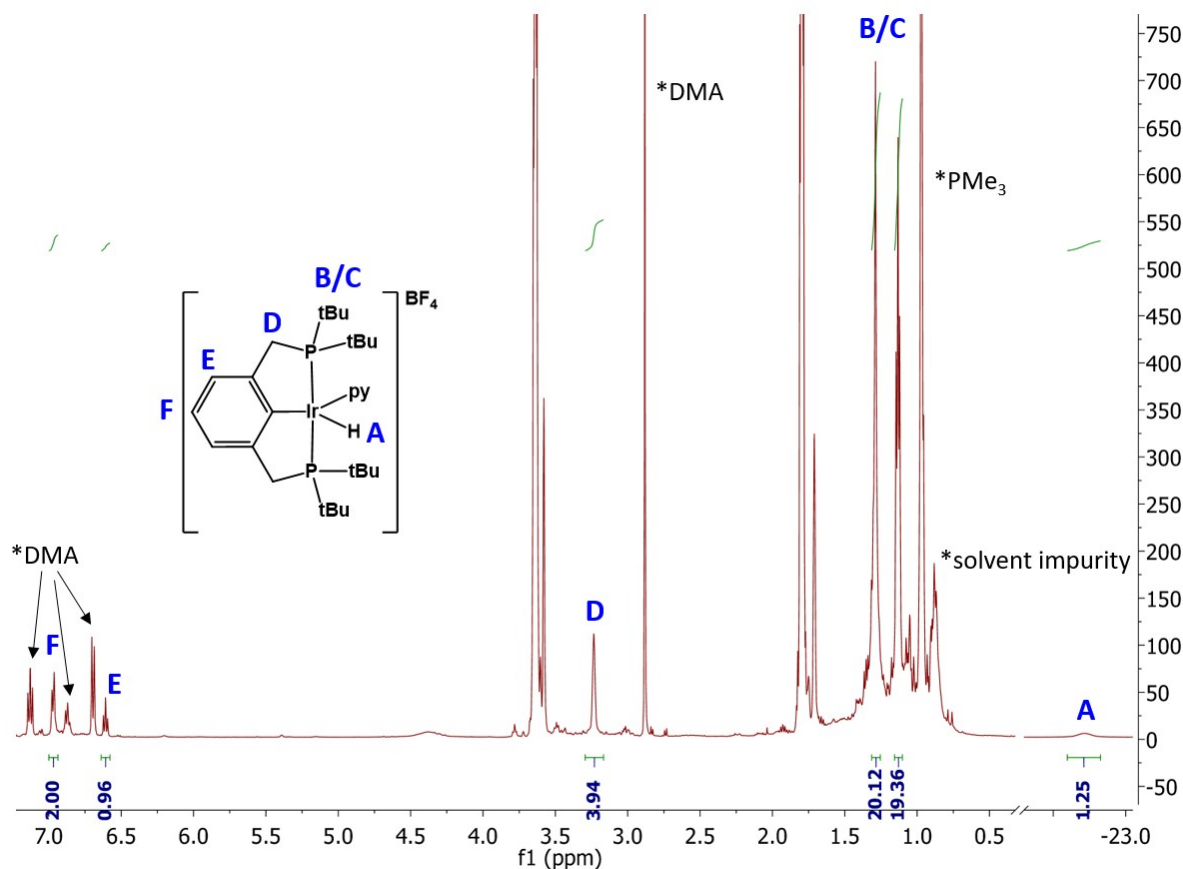

3.4 mg **2** (5.5  $\mu\text{mol}$ ) with 1 eq. DMAH- $\text{BF}_4$  added in  $\text{THF-}d_8$ , subsequently spiked with excess (one drop) pyridine- $d_5$ .  $^1\text{H}$  NMR (500 MHz,  $\text{THF-}d_8$ ):  $\delta$  = 6.91 (d,  $^3J_{\text{H,H}}$  = 7.3 Hz, 2H, *m*-Ph), 6.55 (t,  $^3J_{\text{H,H}}$  = 7.3 Hz, 1H, *p*-Ph), 3.17 (m, 4H,  $\text{CH}_2$ ), 1.23 (m, 18H,  $\text{C}(\text{CH}_3)_3$ ), 1.07 (m, 18H,  $\text{C}(\text{CH}_3)_3$ ), -22.78 (br. s, 1H, Ir-H). While the number of bound pyridine molecules was not confirmed, the relatively downfield hydride resonance is characteristic of a weak donor bound *trans* to the hydride, suggesting a six-coordinate species in the presence of excess pyridine. This matches the reported  $^1\text{H}$  NMR spectrum of  $[(\text{PCP})\text{Ir}(\text{H})(\text{THF})]^+$  in excess pyridine.<sup>1</sup> The  $\text{PMe}_3$  peak is from the internal standard in a capillary tube.

**Fig. S13:**  $^{31}\text{P}\{^1\text{H}\}$  NMR spectrum showing formation of  $[(\text{PCP})\text{Ir}(\text{H})(\text{py})_x]^+$  from reaction of **2a** with pyridine- $d_5$

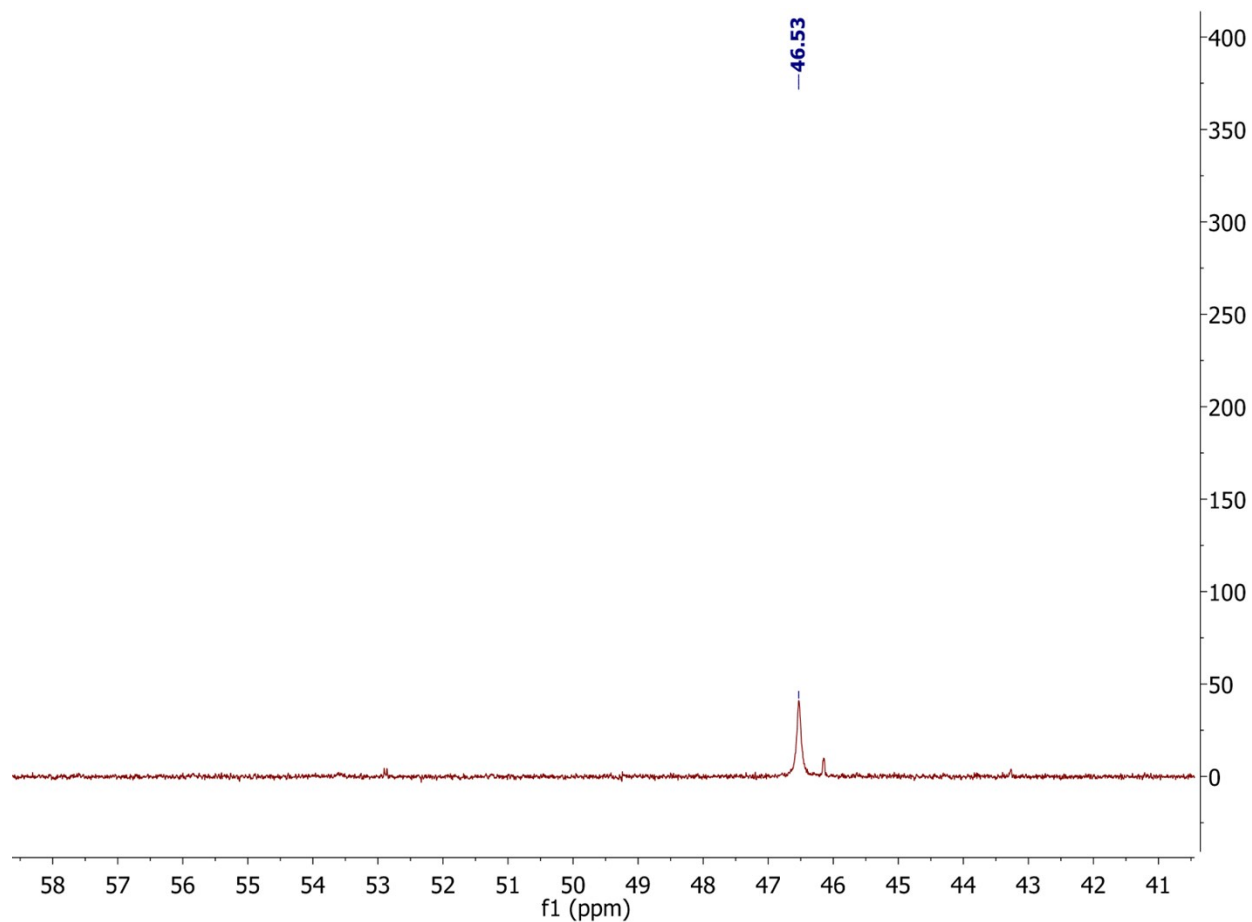

3.4 mg **2** (5.5  $\mu\text{mol}$ ) with 1 eq.  $\text{DMA-BF}_4$  added in  $\text{THF-}d_8$ , subsequently spiked with excess (one drop) pyridine- $d_5$ .  $^{31}\text{P}\{^1\text{H}\}$  NMR (202 MHz,  $\text{THF-}d_8$ )  $\delta = 46.53$  (s). This matches the reported  $^{31}\text{P}$  NMR spectrum of  $[(\text{PCP})\text{Ir}(\text{H})(\text{THF})]^+$  in excess pyridine.<sup>1</sup> Referenced to  $\text{PMe}_3$  in a capillary tube.

**Fig. S14:** ATR-IR spectra of **2**, DMAH-BF<sub>4</sub>, and **2a**

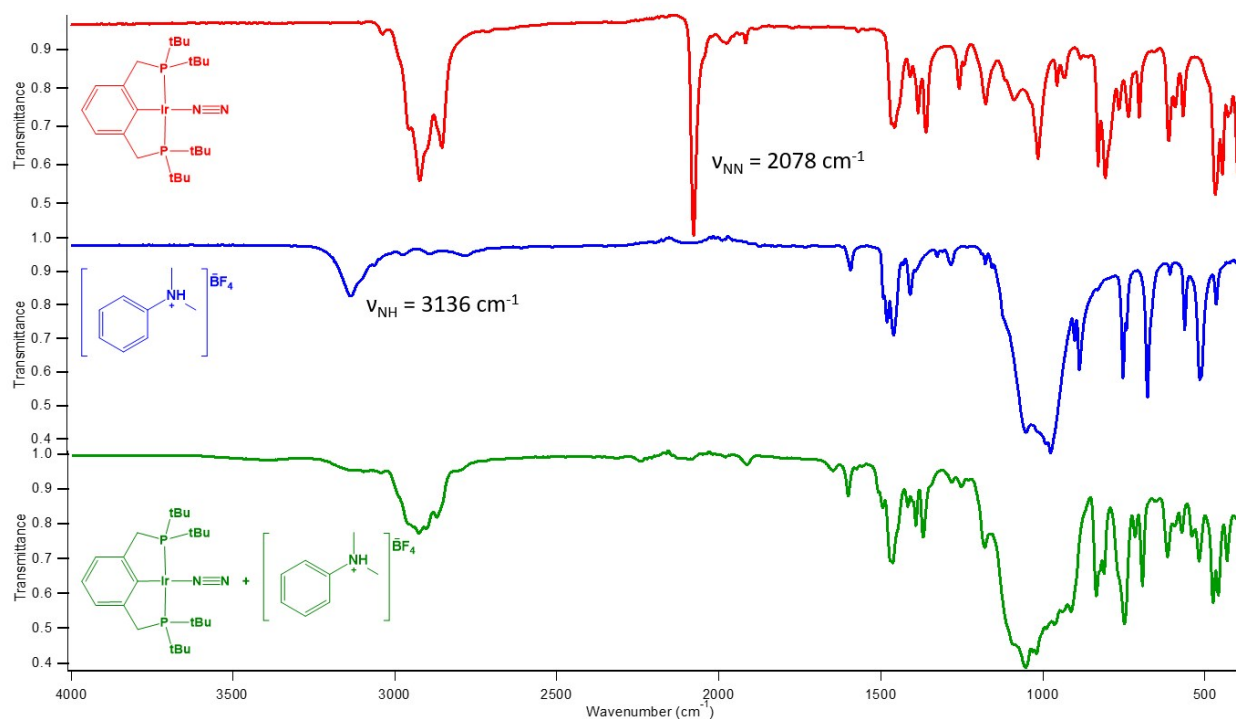

ATR-IR spectrum of **2** (red, top), DMAH-BF<sub>4</sub> (blue, middle), and after the addition of 1 eq. DMAH-BF<sub>4</sub> to 3.4 mg **2** (5.5  $\mu\text{mol}$ ) in THF-*d*<sub>8</sub> to form **2a** (green, bottom). The bottom spectrum was taken using the crude residue obtained after removing THF-*d*<sub>8</sub> under vacuum. The N-N stretch from **2** is no longer visible, indicating that **2a** does not contain N<sub>2</sub> in the solid state. Loss of the N-H stretch from DMAH-BF<sub>4</sub> confirms proton transfer from the anilinium to the metal complex occurred.

**Fig. S15:** CV of **1** in THF with added equiv TFA

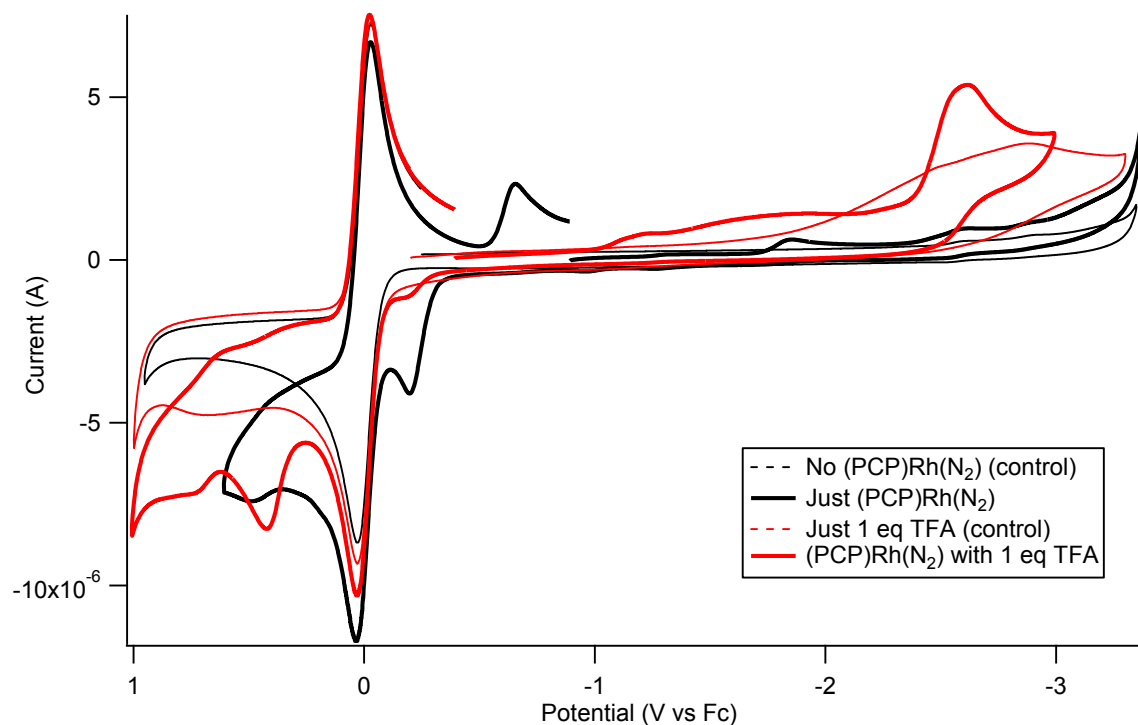

CV of 1.2 mg **1** in 5 mL THF (0.46 mM) with 0.1 M TBA-PF<sub>6</sub> and 1 eq. Fc added (black, solid) taken at 50 mV/s. Upon addition of 1 eq. TFA, an irreversible one-electron reduction occurs at -2.63 V vs. Fc (red, solid). IR compensation was set to 3200  $\Omega$ . Control experiments of 1 equiv Fc in THF with 0.1 M TBA-PF<sub>6</sub> without (black, dashed) and with (red, dashed) 1 eq. TFA confirm that this reduction event is dependent on the presence of both **1** and TFA.

**Fig. S16:** CV of **2** in THF with added equiv TFA

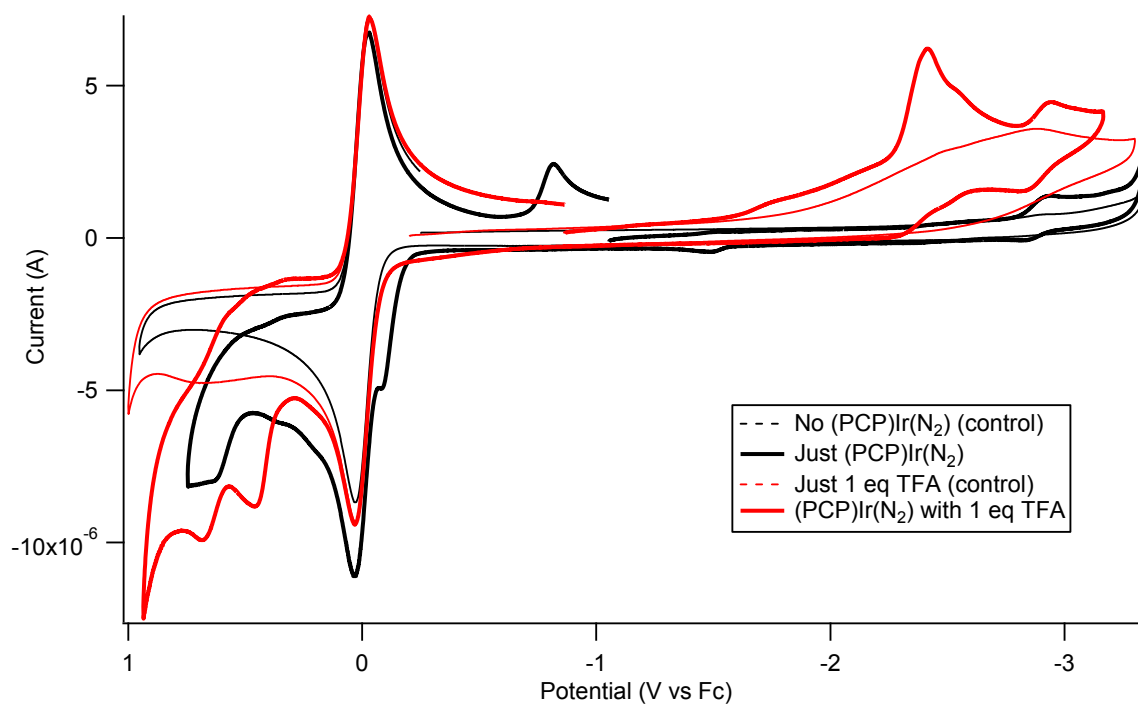

CV of 1.4 mg **2** in 5 mL THF (0.46 mM) with 0.1 M TBA-PF<sub>6</sub> and 1 eq. Fc added (black, solid) taken at 50 mV/s. Upon addition of 1 eq. TFA, an irreversible one-electron reduction occurs at -2.42 V vs. Fc (red, solid), followed by a substoichiometric reversible reduction at -2.88 V vs. Fc. IR compensation was set to 3200 Ω. Control experiments of 1 equiv Fc in THF with 0.1 M TBA-PF<sub>6</sub> without (black, dashed) and with (red, dashed) 1 equiv TFA confirm that these redox events are dependent on the presence of both **2** and TFA.

**Fig. S17:** CV of **1** in THF with large excess of TFA

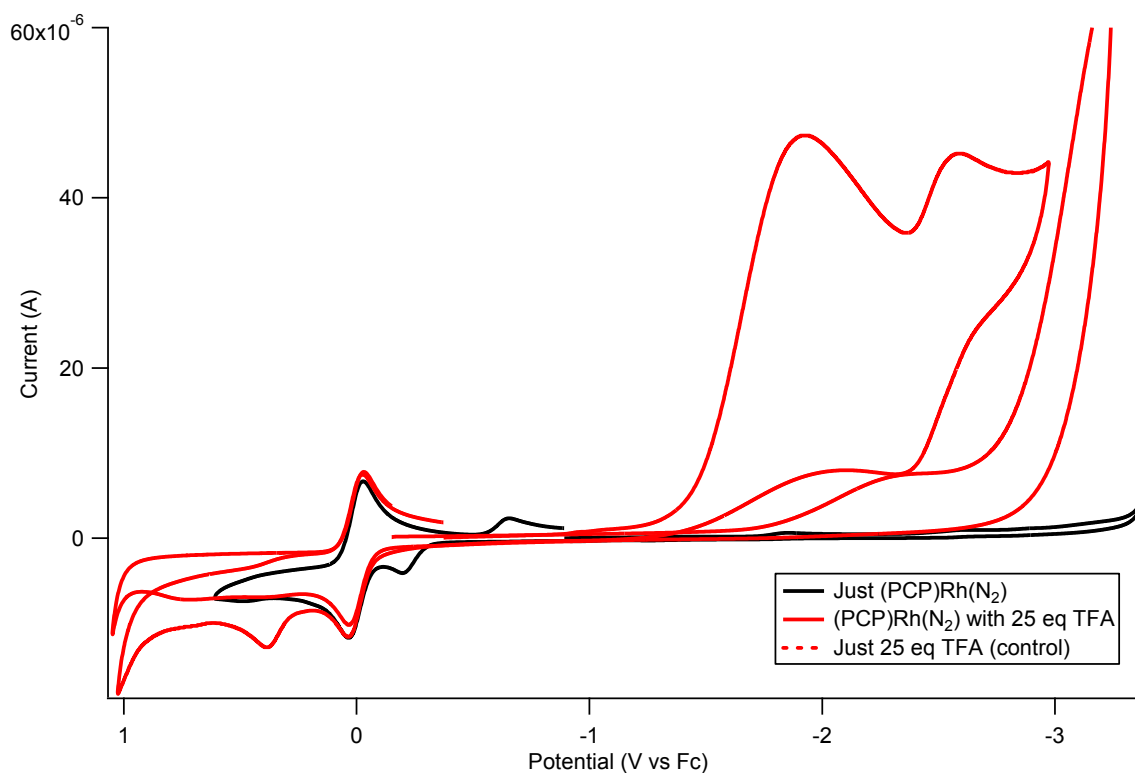

CV of 1.2 mg **1** in 5 mL THF (0.46 mM) with 0.1 M TBA-PF<sub>6</sub> and 1 eq. Fc added (*black, solid*) taken at 50 mV/s. Upon addition of 25 eq. TFA, a large irreversible reduction occurs with peak current at -1.93 V vs Fc (*red, solid*) followed by a second reduction at -2.59 V vs Fc. IR compensation was set to 3200  $\Omega$ . The large current of the first irreversible reduction upon flooding with acid (compare to 1 equiv TFA in Fig. S15) is characteristic of electrocatalytic proton reduction. Control experiments of 1 eq. Fc with 25 equiv TFA (*red, dashed*) confirm that the catalytic current is dependent on the presence of **1**.

**Fig. S18:** CV of **2** in THF with large excess of TFA

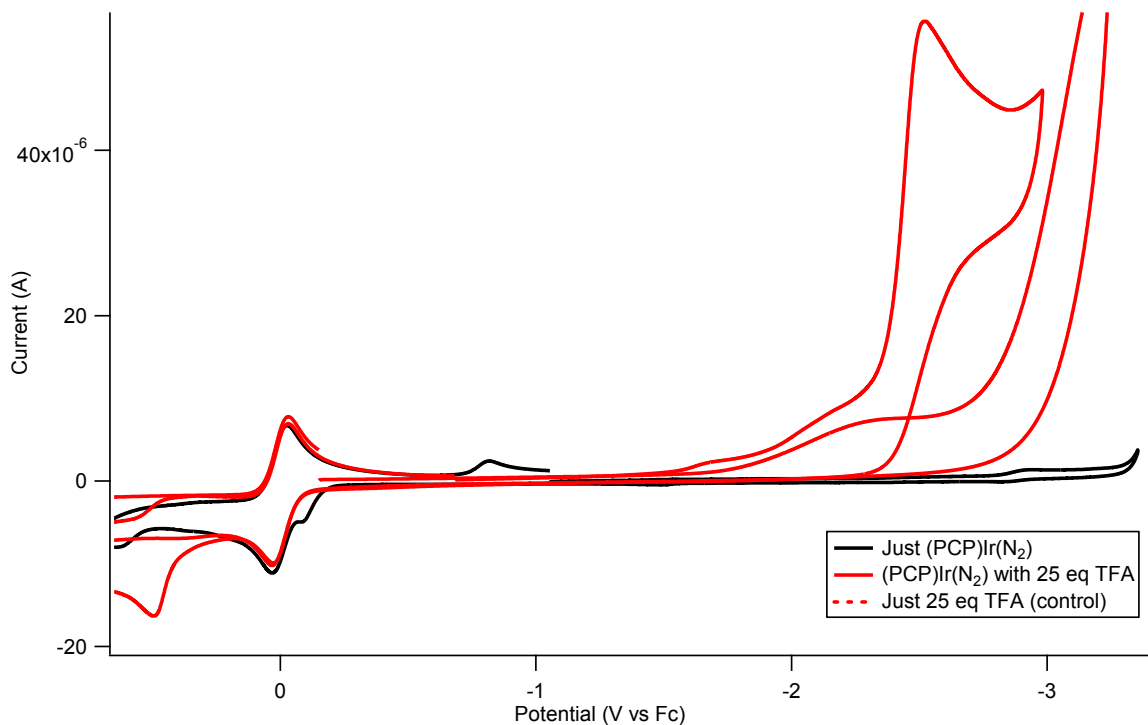

CV of 1.4 mg **2** in 5 mL THF (0.46 mM) with 0.1 M TBA-PF<sub>6</sub> and 1 eq. Fc added (*black, solid*) taken at 50 mV/s. Upon addition of 25 eq. TFA, a large irreversible reduction occurs with peak current at -2.53 V vs Fc (*red, solid*). IR compensation was set to 3200  $\Omega$ . The large current enhancement of this irreversible reduction upon flooding with acid (compare to 1 equiv TFA in Fig. S16) is characteristic of electrocatalytic proton reduction. Control experiments of 1 equiv Fc with 25 equiv TFA (*red, dashed*) confirm that the catalytic current is dependent on the presence of **2**.

**Fig. S19:** CV of **2** in THF with added DMAH-BF<sub>4</sub>

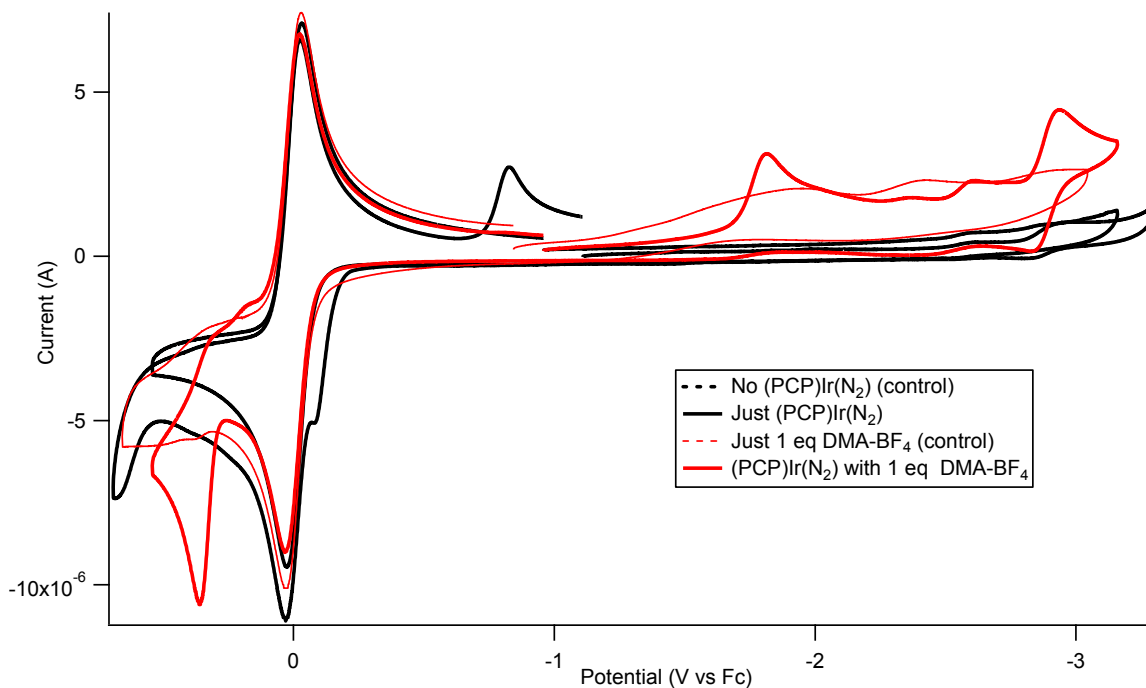

CV of 1.3 mg **2** in 5 mL THF (0.42 mM) with 0.1 M TBA-PF<sub>6</sub> and 1 equiv Fc added (black, solid) taken at 50 mV/s. Upon addition of 1 eq. DMAH-BF<sub>4</sub>, an irreversible one-electron reduction occurs at -1.82 V vs. Fc (red, solid), followed by a reversible reduction at -2.89 V vs. Fc. IR compensation was set to 3000  $\Omega$ . Control experiments of 1 equiv Fc in THF with 0.1 M TBA-PF<sub>6</sub> without (black, dashed) and with (red, dashed) 1 equiv DMAH-BF<sub>4</sub> confirm that these redox events are dependent on the presence of both **2** and DMAH-BF<sub>4</sub>.

**Fig. S20:**  $^1\text{H}$  NMR spectra showing reduction of **2a** with  $\text{CoCp}_2^*$

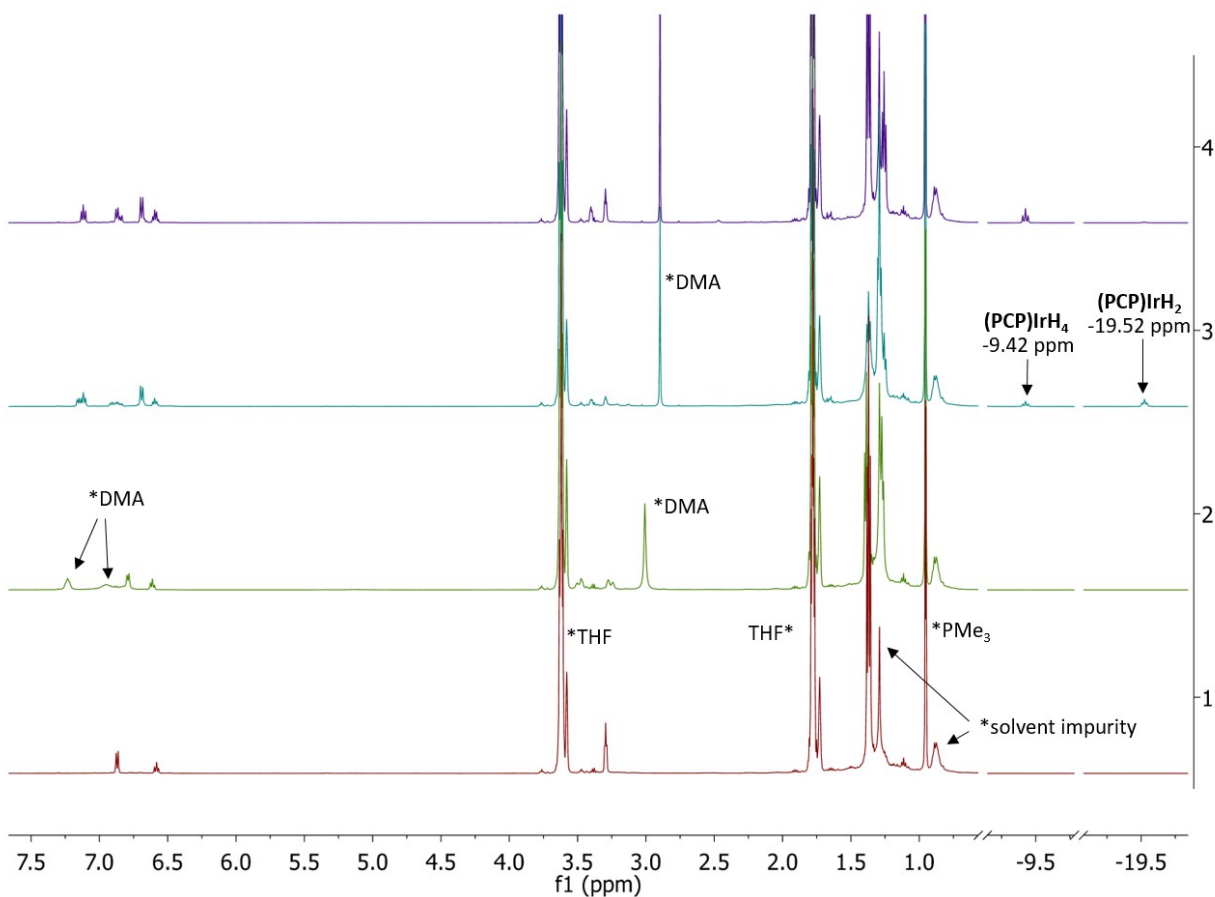

*Bottom (1, maroon):* 2.9 mg **2** (4.7  $\mu\text{mol}$ ) in  $\text{THF-}d_8$ .  $^1\text{H}$  NMR (500 MHz,  $\text{THF-}d_8$ ):  $\delta$  = 6.83 (d,  $J$  = 7.4 Hz, 2H), 6.54 (t,  $J$  = 7.4 Hz, 1H), 3.25 (m,  $J$  = 3.9 Hz, 4H), 1.33 (m,  $J$  = 6.4 Hz, 36H). *Second (2, light green):* 2.9 mg **2** with 1 eq.  $\text{DMA-BF}_4$  added in  $\text{THF-}d_8$  to form **2a**. *Third (3, blue-green):* Reduction of **2a** with 1.1 eq.  $\text{CoCp}_2^*$  in  $\text{THF-}d_8$ , showing hydride resonances at -9.42 ppm and -19.52 ppm characteristic of  $(\text{PCP})\text{IrH}_4$  and  $(\text{PCP})\text{IrH}_2$ , respectively.<sup>2, 3</sup> Aromatic resonances at 6.83 ppm (d,  $J$  = 7.4 Hz) and 6.54 ppm (t,  $J$  = 7.4 Hz) correspond to **2**. *Top (4, purple):*  $^1\text{H}$  NMR spectrum after one week showing full conversion to **2** and  $(\text{PCP})\text{IrH}_4$ . The  $\text{PMe}_3$  peak is from the internal standard in a capillary tube.

**Fig. S21:**  $^1\text{H}$  NMR spectrum of mixture of  $(\text{PCP})\text{IrH}_2$  and  $(\text{PCP})\text{IrH}_4$

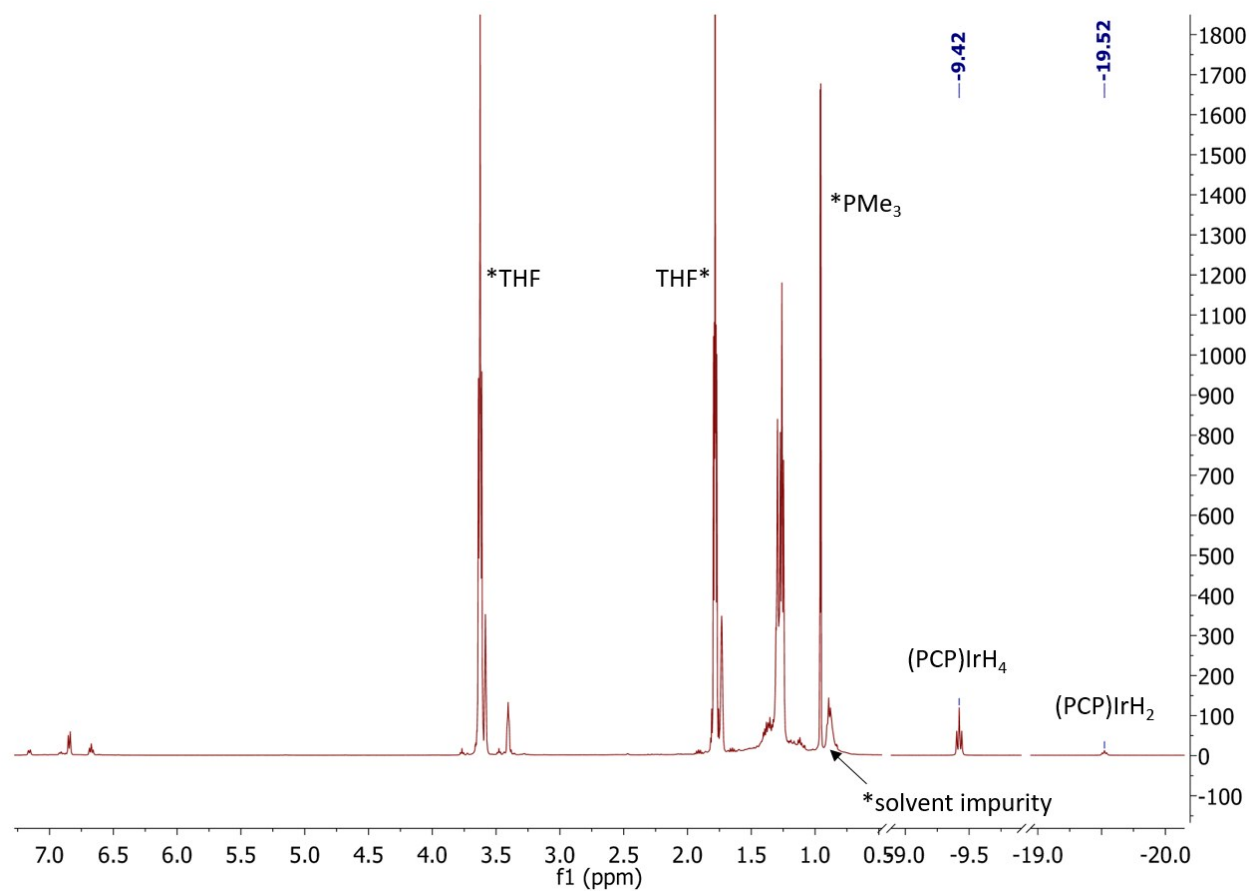

Mixture of  $(\text{PCP})\text{IrH}_2^2$  and  $(\text{PCP})\text{IrH}_4^3$  in  $\text{THF-}d_8$ , which were prepared according to literature procedures and match reported spectra. The  $\text{PMe}_3$  peak is from the internal standard in a capillary tube.

**Fig. S22:**  $^{31}\text{P}\{^1\text{H}\}$  NMR spectrum of mixture of  $(\text{PCP})\text{IrH}_2$  and  $(\text{PCP})\text{IrH}_4$

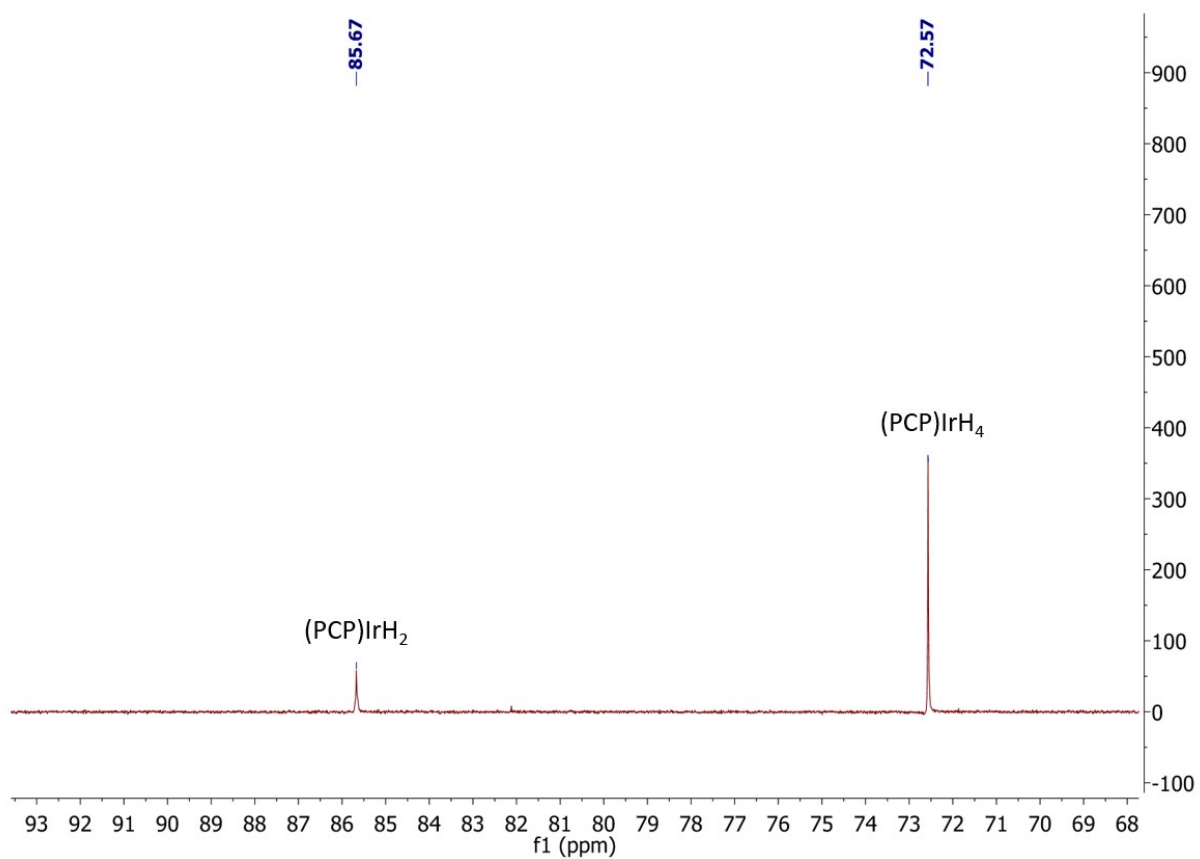

Mixture of  $(\text{PCP})\text{IrH}_2$  and  $(\text{PCP})\text{IrH}_4$  in  $\text{THF-}d_8$ , which were prepared according to literature procedures and match reported spectra. Referenced to  $\text{PMe}_3$  in a capillary tube.

## References:

1. A. G. Walden. "Oxidative Electrochemistry of Molecular Catalysts." University of North Carolina at Chapel Hill, 2016.
2. M. Gupta, C. Hagen, R. J. Flesher, W. C. Kaska and C. M. Jensen, *Chem. Commun.*, 1996, **17**, 2083-2084.
3. T. J. Hebden, K. I. Goldberg, D. M. Heinekey, X. Zhang, T. J. Emge, A. S. Goldman and K. Krogh-Jespersen, *Inorg. Chem.*, 2010, **49**, 1733-1742.
